# Supplementary material
Source: MDPI journal article supplement (https://www.mdpi.com/2073-4352/8/11/439)
Supplement: s1 [file s1]

# Synthesis, Structure, and Photomagnetic Properties of a Hydrogen-Bonded Lattice of [Fe(bpp)<sub>2</sub>]<sup>2+</sup> Spin-Crossover Complexes and Nicotinate Anions

Verónica Jornet-Mollá, Carlos Giménez-Saiz and Francisco M. Romero

**Table S1.** Enthalpy and entropy values for peaks observed in Differential scanning calorimetry (DSC) curves.

| Compound                                                     | Curve | T/ K        | $\Delta H/ \text{KJ}\cdot\text{mol}^{-1}$ | $\Delta S/ \text{J}\cdot\text{mol}^{-1}\cdot\text{K}^{-1}$ |
|--------------------------------------------------------------|-------|-------------|-------------------------------------------|------------------------------------------------------------|
| [Fe(bpp) <sub>2</sub> ](nic) <sub>2</sub> ·4H <sub>2</sub> O | 1     | 334         | 147                                       | 450                                                        |
|                                                              | 2     | 218/262/282 | 0.54/1.53/2.2                             | 5.50/6.30/8.33                                             |
|                                                              | 3     | 229/264/289 | 1.0/1.28/3.1                              | 5.50/5.24/10.4                                             |

**Table S2.** Intermolecular hydrogen bonds in the crystal structure of 1·4H<sub>2</sub>O.<sup>a</sup>

| D...A           | $d_{D...A}/ \text{\AA}$ |
|-----------------|-------------------------|
| N(1)...O(3W)    | 2.633(3)                |
| N(5)...O(1)#1   | 2.662(3)                |
| N(6)...O(4W)#2  | 2.671(3)                |
| N(10)...O(4)    | 2.635(3)                |
| O(1W)...O(3)#3  | 2.757(3)                |
| O(1W)...N(11)   | 2.987(4)                |
| O(2W)...O(2)#4  | 2.745(3)                |
| O(2W)...N(12)#5 | 2.900(4)                |
| O(3W)...O(2W)   | 2.722(3)                |
| O(3W)...O(1)    | 2.749(3)                |
| O(4W)...O(1W)   | 2.778(3)                |
| O(4W)...O(4)#6  | 2.764(3)                |

<sup>a</sup> Symmetry transformations used to generate equivalent atoms:

|                     |                       |
|---------------------|-----------------------|
| #1 $x-1, y, z$      | #2 $x-1, -y+1, z-1/2$ |
| #3 $x, -y, z+1/2$   | #4 $x, y+1, z$        |
| #5 $x, -y+1, z+1/2$ | #6 $x+1, -y, z+1/2$   |

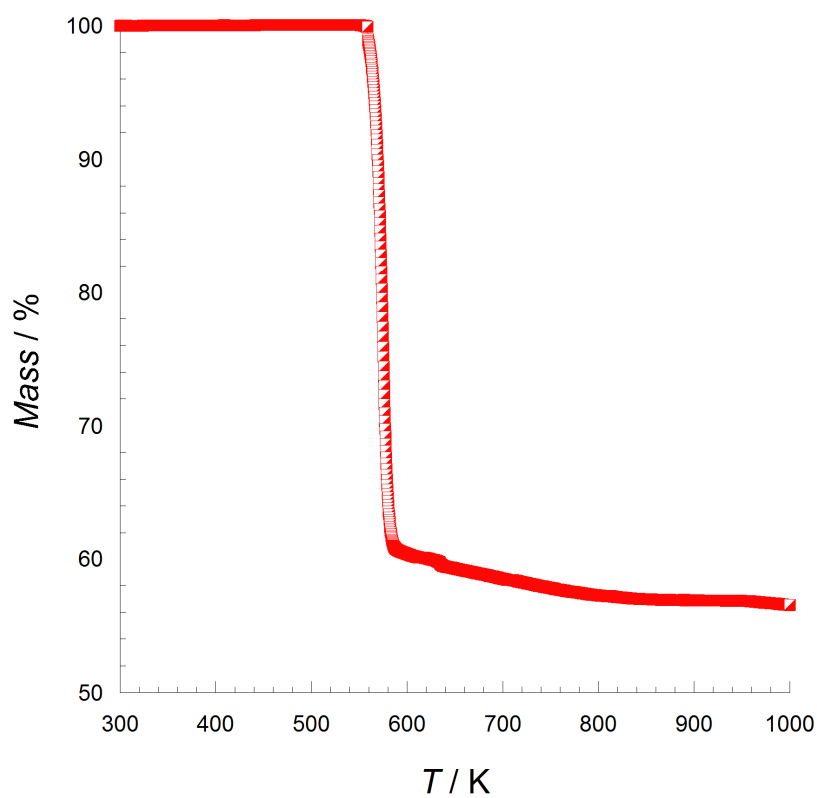

**Figure S1.** Thermogravimetric analysis of  $\text{Ag}(\text{C}_6\text{H}_4\text{NO}_2)$ . The plot confirms the anhydrous character of this salt.

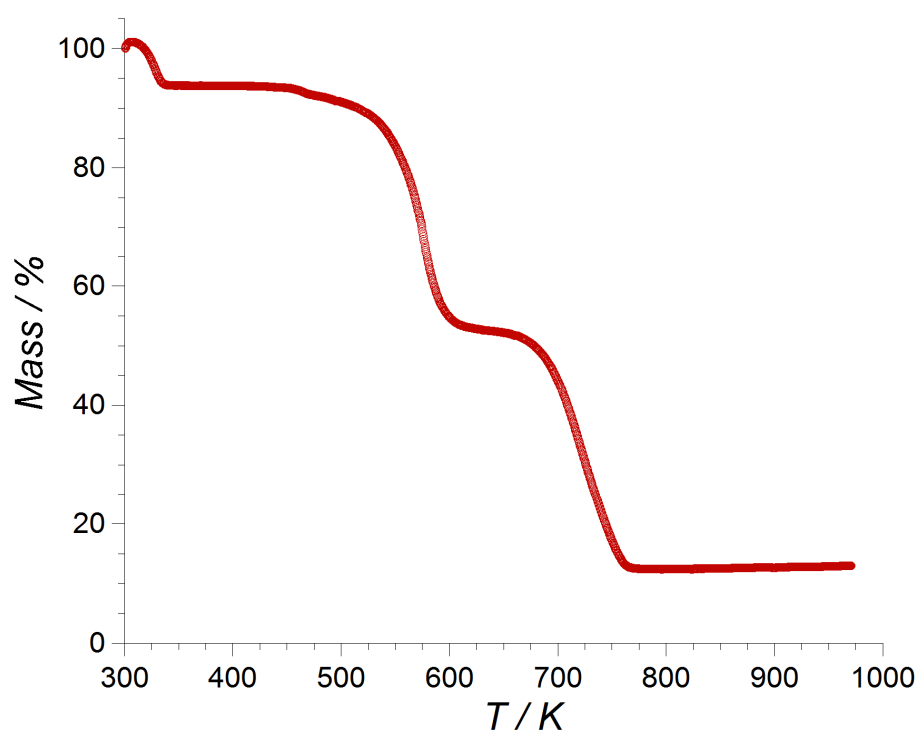

**Figure S2.** Thermogravimetric analysis of  $1 \cdot 4\text{H}_2\text{O}$ .

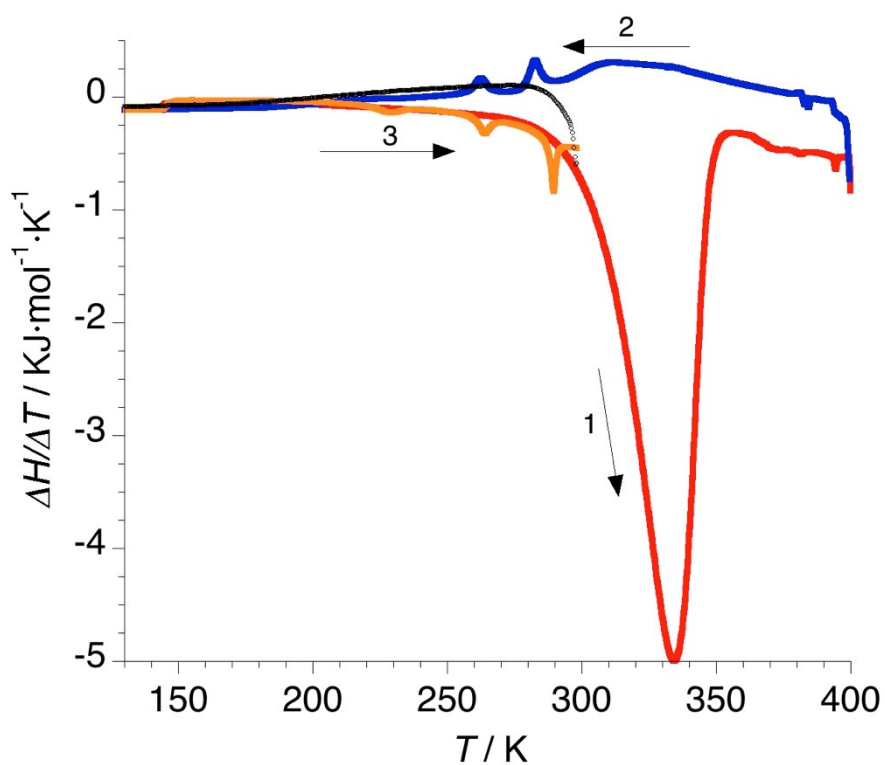

**Figure S3.** Differential scanning calorimetry of  $1\cdot 4\text{H}_2\text{O}$ . Black line: cooling down to 133 K. Curve 1: first heating (dehydration process). Curves 2 and 3: first cooling and second heating processes, respectively.

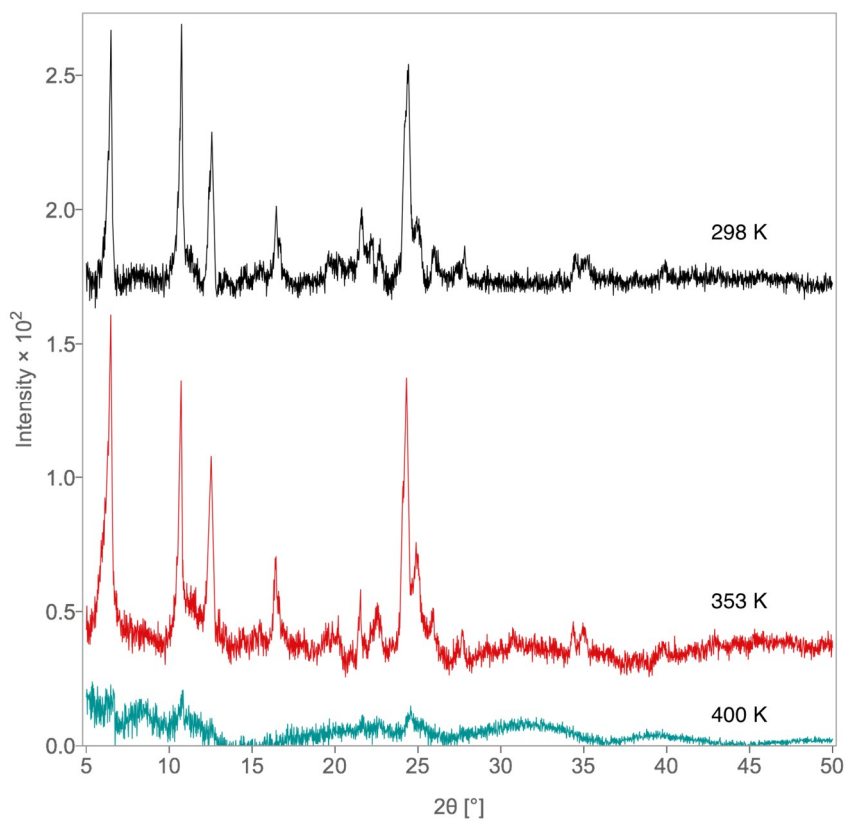

**Figure S4.** Powder X-ray diffractograms of **1** at different temperatures.

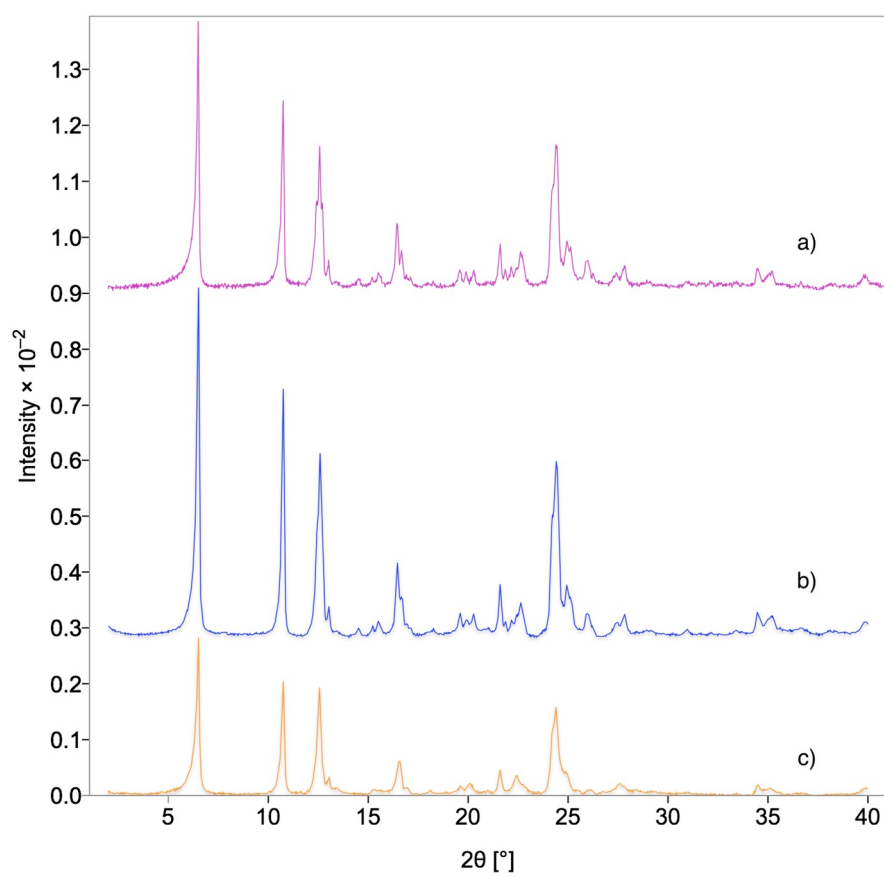

**Figure S5.** Powder X-ray diffractograms of 1·4H<sub>2</sub>O. **a)** original sample; **b)** after dehydration under vacuum at 400 K for 2 h and subsequent rehydration; **c)** after a second dehydration-rehydration cycle.
